# Supplementary material for: Dengue virus serotype infection specifies the activation of the unfolded protein response
Source: PubMed Central journal article supplement (PMC2045667; doi:10.1186/1743-422x-4-91), 2007-09-24

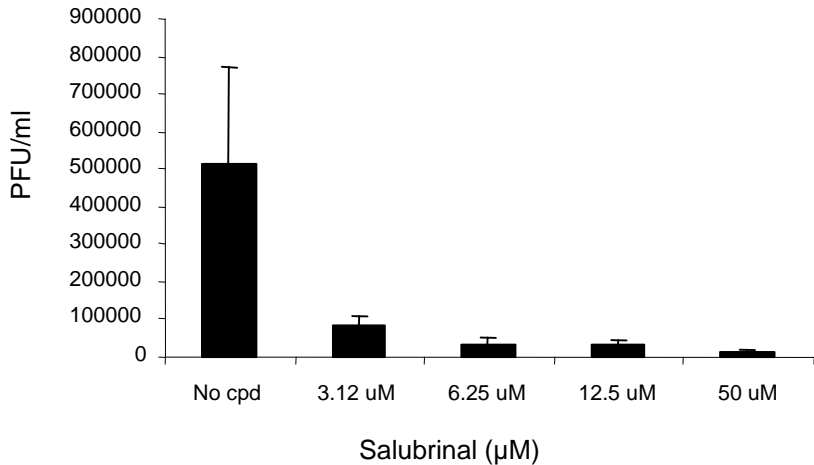

Supplement: 1743-422X-4-91-S1.pdf [file 1743-422X-4-91-S1.pdf]
